# Supplementary material for: Rhenium N-heterocyclic carbene complexes block growth of aggressive cancers by inhibiting FGFR- and SRC-mediated signalling
Source: Research Square preprint supplement (doi:10.21203/rs.3.rs-54828/v2), 2020-11-11
Supplement: Supplementary file 1 [file 8d7b4689dd727b16e456f5ec.docx]

**Tables**

**
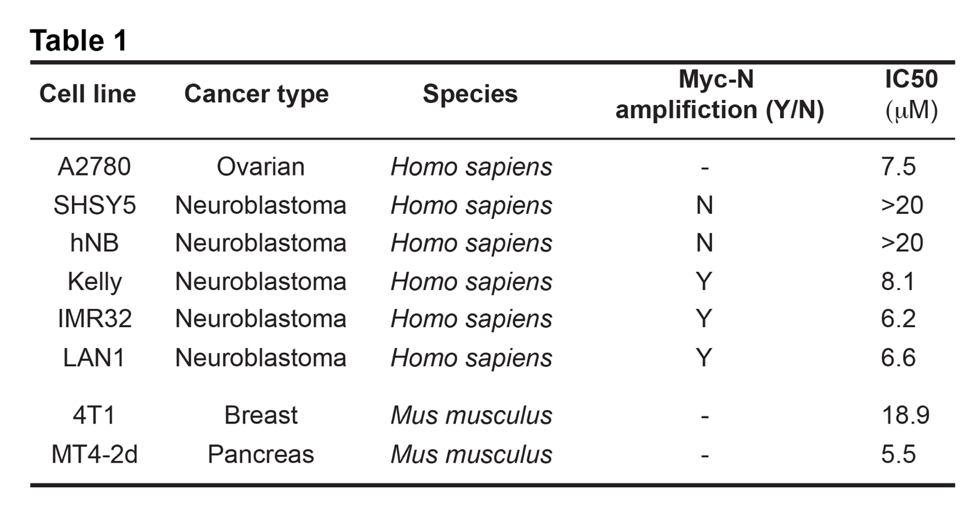
**

**Table 1:** *JVG045 IC50 values for different human and murine cancer cell lines.*


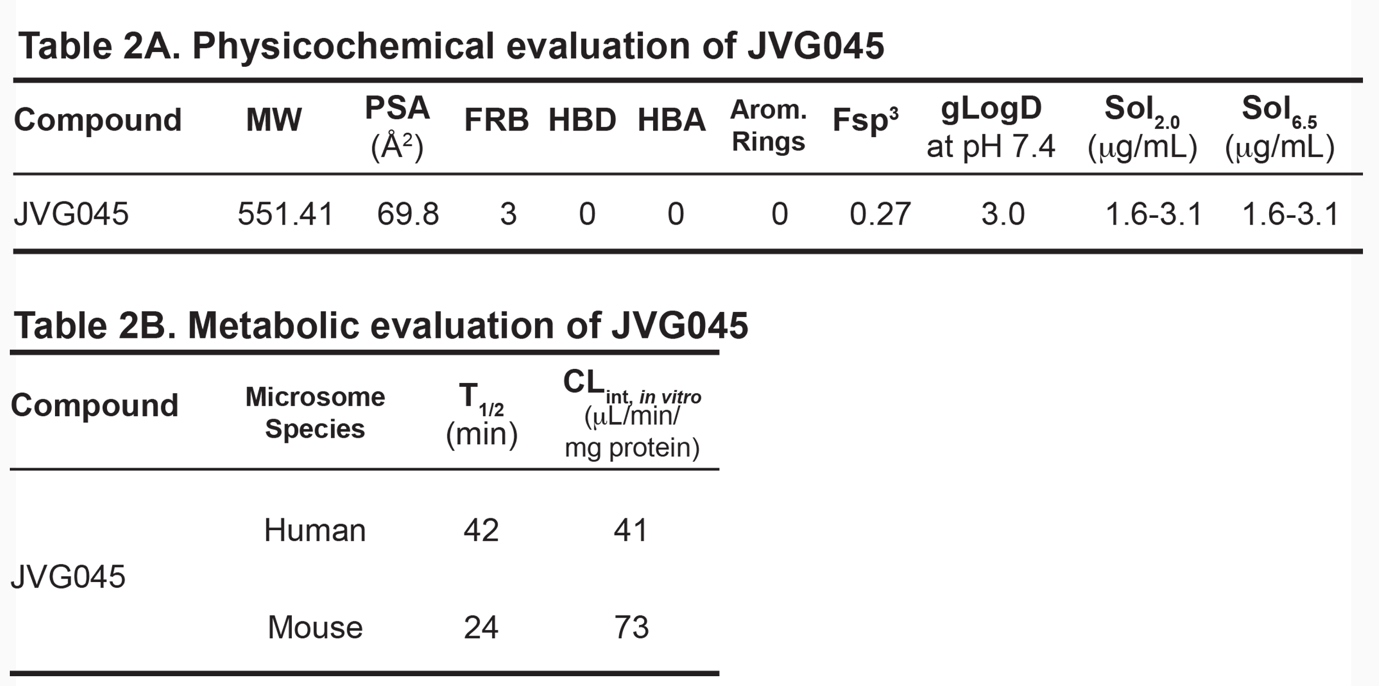


**Table 2.** (A)*Physicochemical and* (B) *Metabolic evaluation of JVG045.*
